# Supplementary material for: Cardiovascular autonomic neuropathy and the impact on progression of diabetic kidney disease in type 1 diabetes
Source: PubMed Central journal article supplement — BMJ Open Diabetes Res Care. 2021 Oct 13;9(1):e002289. doi: 10.1136/bmjdrc-2021-002289 (PMC8515448; doi:10.1136/bmjdrc-2021-002289), 2021-10-13
Supplement: bmjdrc-2021-002289supp001.pdf [file bmjdrc-2021-002289supp001.pdf]

Supplemental table 1 unadjusted continuous CAN indices vs Slope of GFR and UACR

|         | N   | Parameter   | Outcomes | Estimate | (95% CI)       | P value |
|---------|-----|-------------|----------|----------|----------------|---------|
| Model 1 | 141 | Valsalva    | UACR     | 10.56    | (0.15;22.06)   | 0.048   |
|         | 144 | Valsalva    | GFR      | 0.23     | (-0.94;1.40)   | 0.704   |
|         | 208 | 30/15 ratio | UACR     | 40.56    | (9.67;80.14)   | 0.008   |
|         | 212 | 30/15 ratio | GFR      | 0.45     | (-2.37;3.27)   | 0.753   |
|         | 211 | E/I ratio   | UACR     | 37.38    | (6.74;76.82)   | 0.014   |
|         | 215 | E/I ratio   | GFR      | 1.58     | (1.27;4.44)    | 0.277   |
|         | 213 | SDNN        | UACR     | 0.14     | (0.002;0.28)   | 0.047   |
|         | 217 | SDNN        | GFR      | -0.004   | (-0.02;0.01)   | 0.635   |
| Model 2 | 141 | Valsalva    | UACR     | 9.39     | (-1.29;21.21)  | 0.088   |
|         | 144 | Valsalva    | GFR      | 0.071    | (-1.12;1.26)   | 0.907   |
|         | 208 | 30/15 ratio | UACR     | 39.66    | (9.55;78.04)   | 0.008   |
|         | 212 | 30/15 ratio | GFR      | 0.386    | (-2.41;3.18)   | 0.786   |
|         | 211 | E/I ratio   | UACR     | 34.80    | (4.78;73.43)   | 0.021   |
|         | 215 | E/I ratio   | GFR      | 1.65     | (-1.22;4.53)   | 0.260   |
|         | 213 | SDNN        | UACR     | 0.13     | (-0.01;0.26)   | 0.071   |
|         | 217 | SDNN        | GFR      | -0.0039  | (-0.01;0.01)   | 0.625   |
| Model 3 | 141 | Valsalva    | UACR     | 10.88    | (-0.16;23.15)  | 0.055   |
|         | 144 | Valsalva    | GFR      | -0.29    | (-1.47;0.88)   | 0.626   |
|         | 207 | 30/15 ratio | UACR     | 37.47    | (7.42;75.91)   | 0.012   |
|         | 211 | 30/15 ratio | GFR      | -0.36    | (-3.10;23.38)  | 0.797   |
|         | 210 | E/I ratio   | UACR     | 26.60    | (-3.25;65.65)  | 0.087   |
|         | 214 | E/I ratio   | GFR      | -0.02    | (-2.98;2.95)   | 0.992   |
|         | 212 | SDNN        | UACR     | 0.11     | (-0.03;0.26)   | 0.109   |
|         | 216 | SDNN        | GFR      | -0.01    | (-0.02;0.01)   | 0.286   |
| Model 4 | 141 | Valsalva    | UACR     | 10.33    | (-0.71;22.60)  | 0.069   |
|         | 144 | Valsalva    | GFR      | -0.07    | (-1.22;1.08)   | 0.905   |
|         | 205 | 30/15 ratio | UACR     | 31.76    | (4.06;66.82)   | 0.023   |
|         | 210 | 30/15 ratio | GFR      | -0.18    | (-2.97;2.60)   | 0.898   |
|         | 208 | E/I ratio   | UACR     | 12.98    | (-13.09;46.89) | 0.362   |
|         | 213 | E/I ratio   | GFR      | 0.2006   | (-2.92;3.32)   | 0.900   |
|         | 210 | SDNN        | UACR     | 0.05     | (-0.08;0.19)   | 0.439   |
|         | 215 | SDNN        | GFR      | -0.01    | (-0.02;0.01)   | 0.319   |
| Model 5 | 129 | Valsalva    | UACR     | 11.77    | (0.76;23.99)   | 0.037   |
|         | 126 | Valsalva    | GFR      | 0.37     | (-0.85;1.58)   | 0.554   |
|         | 185 | 30/15 ratio | UACR     | 30.24    | (2.53;65.45)   | 0.032   |
|         | 184 | 30/15 ratio | GFR      | -0.47    | (-3.34;2.40)   | 0.749   |
|         | 185 | E/I ratio   | UACR     | 13.94    | (-13.73;50.48) | 0.359   |
|         | 184 | E/I ratio   | GFR      | 0.0007   | (-3.40;3.40)   | 1.000   |
|         | 187 | SDNN        | UACR     | 0.067    | (-0.07;0.2)    | 0.321   |
|         | 186 | SDNN        | GFR      | -0.009   | (-0.03;0.01)   | 0.263   |

Supplemental table 1. CAN, cardiovascular autonomic neuropathy; CART, cardiac autonomic reflex tests.

\*Estimates are for a 1-unit change (95% CI).

Model 1: Unadjusted. Model 2: Adjusted for age and sex. Model 3: as model 2 and additionally adjusted for duration of diabetes, Hba1C, BMI, smoking, exercise, beta blocker use, LDL cholesterol and systolic blood pressure. Model 4: as model 3, and additionally adjusted for baseline estimated glomerular filtration rate (eGFR). Model 5: as model 4 and additionally adjusted for urinary albumin excretion rate.

Supplemental table 2 CAN diagnosis and CART vs ESKD

|         | Events | Outcomes    | Hazard Ratio                        | (95% CI)       | P value |
|---------|--------|-------------|-------------------------------------|----------------|---------|
| Model 1 | 9      | CAN         | 2.695                               | (0.724;10.040) | 0.14    |
|         | 9      | E/I Ratio   | 2.752                               | (0.688;11.006) | 0.152   |
|         | 5      | Valsalva    | 2.307                               | (0.385;13.807) | 0.360   |
|         | 8      | 30/15 ratio | 3.191                               | (0.763;13.357) | 0.114   |
| Model 2 | 9      | CAN         | 2.422                               | (0.644;9.105)  | 0.19    |
|         | 9      | E/I Ratio   | 2.615                               | (0.647;10.564) | 0.177   |
|         | 5      | Valsalva    | 1.719                               | (0.287;10.294) | 0.553   |
|         | 8      | 30/15 ratio | 2.783                               | (0.661;11.711) | 0.163   |
| Model 3 | 9      | CAN         | 1.567                               | (0.366;6.704)  | 0.545   |
|         | 9      | E/I ratio   | 1.839                               | (0.416;8.134)  | 0.422   |
|         | 5      | Valsalva    | 0.004                               | (0;2.125)      | 0.082   |
|         | 8      | 30/15 ratio | 2.377                               | (0.497;11.369) | 0.278   |
| Model 4 | 9      | CAN         | 0.250                               | (0.026;2.403)  | 0.230   |
|         | 9      | E/I Ratio   | 0.121                               | (0.010;1.441)  | 0.095   |
|         | -      | Valsalva    | not enough data to perform analyses |                |         |
|         | 8      | 30/15 ratio | 0.530                               | (0.042;6.742)  | 0.625   |
| Model 5 | -      | CAN         | not enough data to perform analyses |                |         |
|         | -      | E/I Ratio   | not enough data to perform analyses |                |         |
|         | -      | Valsalva    | not enough data to perform analyses |                |         |
|         | -      | 30/15 ratio | not enough data to perform analyses |                |         |

Supplemental table 2. CAN, cardiovascular autonomic neuropathy; CART, cardiac autonomic reflex tests.

\*Estimates are for increase in standardized units.

Model 1: Unadjusted. Model 2: Adjusted for age and sex. Model 3: as model 2 and additionally adjusted for duration of diabetes, Hba1C, BMI, smoking, exercise, beta blocker use, LDL cholesterol and systolic blood pressure. Model 4: as model 3, and additionally

adjusted for baseline estimated glomerular filtration rate (eGFR). Model 5: as model 4 and additionally adjusted for urinary albumin excretion rate.

CARTs were evaluated as binary variables based on age-specific cut-off values.

Supplemental figure 1

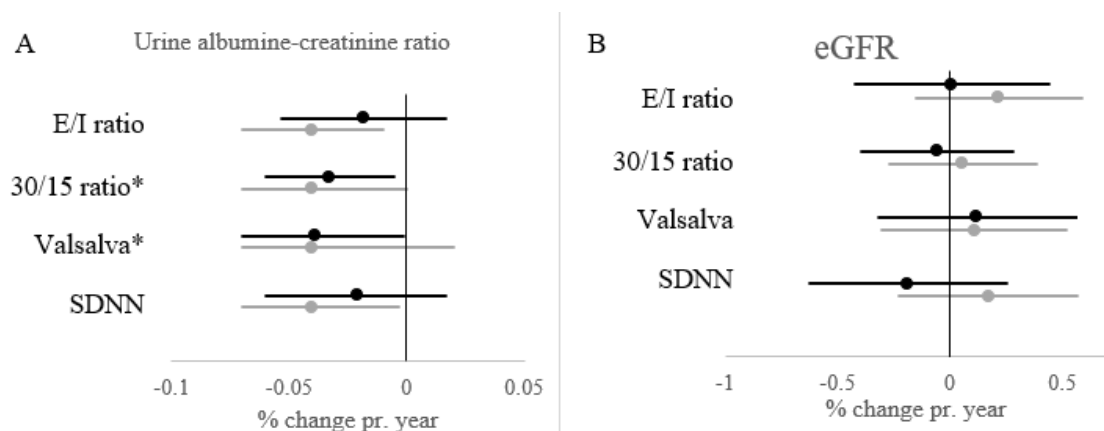

Supplemental figure 1. The effect of change in results on autonomic tests on progression of diabetic kidney disease: annual change in UACR (A) and annual change in eGFR (B).

Estimates for standardized one-unit increase in heart rate, for deep breathing (E/I ratio), standing (30/15 ratio), the Valsalva manoeuvre and the SDNN intervals (milliseconds).

Adjusted model including age, and sex (grey), adjusted model including in addition baseline HbA<sub>1c</sub>, BMI, smoking, exercise, beta blocker use, LDL cholesterol, systolic blood pressure, eGFR and urinary albumin excretion rate at baseline (black).
